# Supplementary material for: Whole-genome analysis and fermentation-metabolite profiling of a cellulolytic Arthrobacter sp. FMD isolated from forest musk-deer faeces
Source: Research Square preprint supplement (doi:10.21203/rs.3.rs-7059040/v1), 2025-08-08
Supplement: Supplementary file 1 [file d356a93b2db5f36cae58fa3f.docx]

*Supplementary materials*


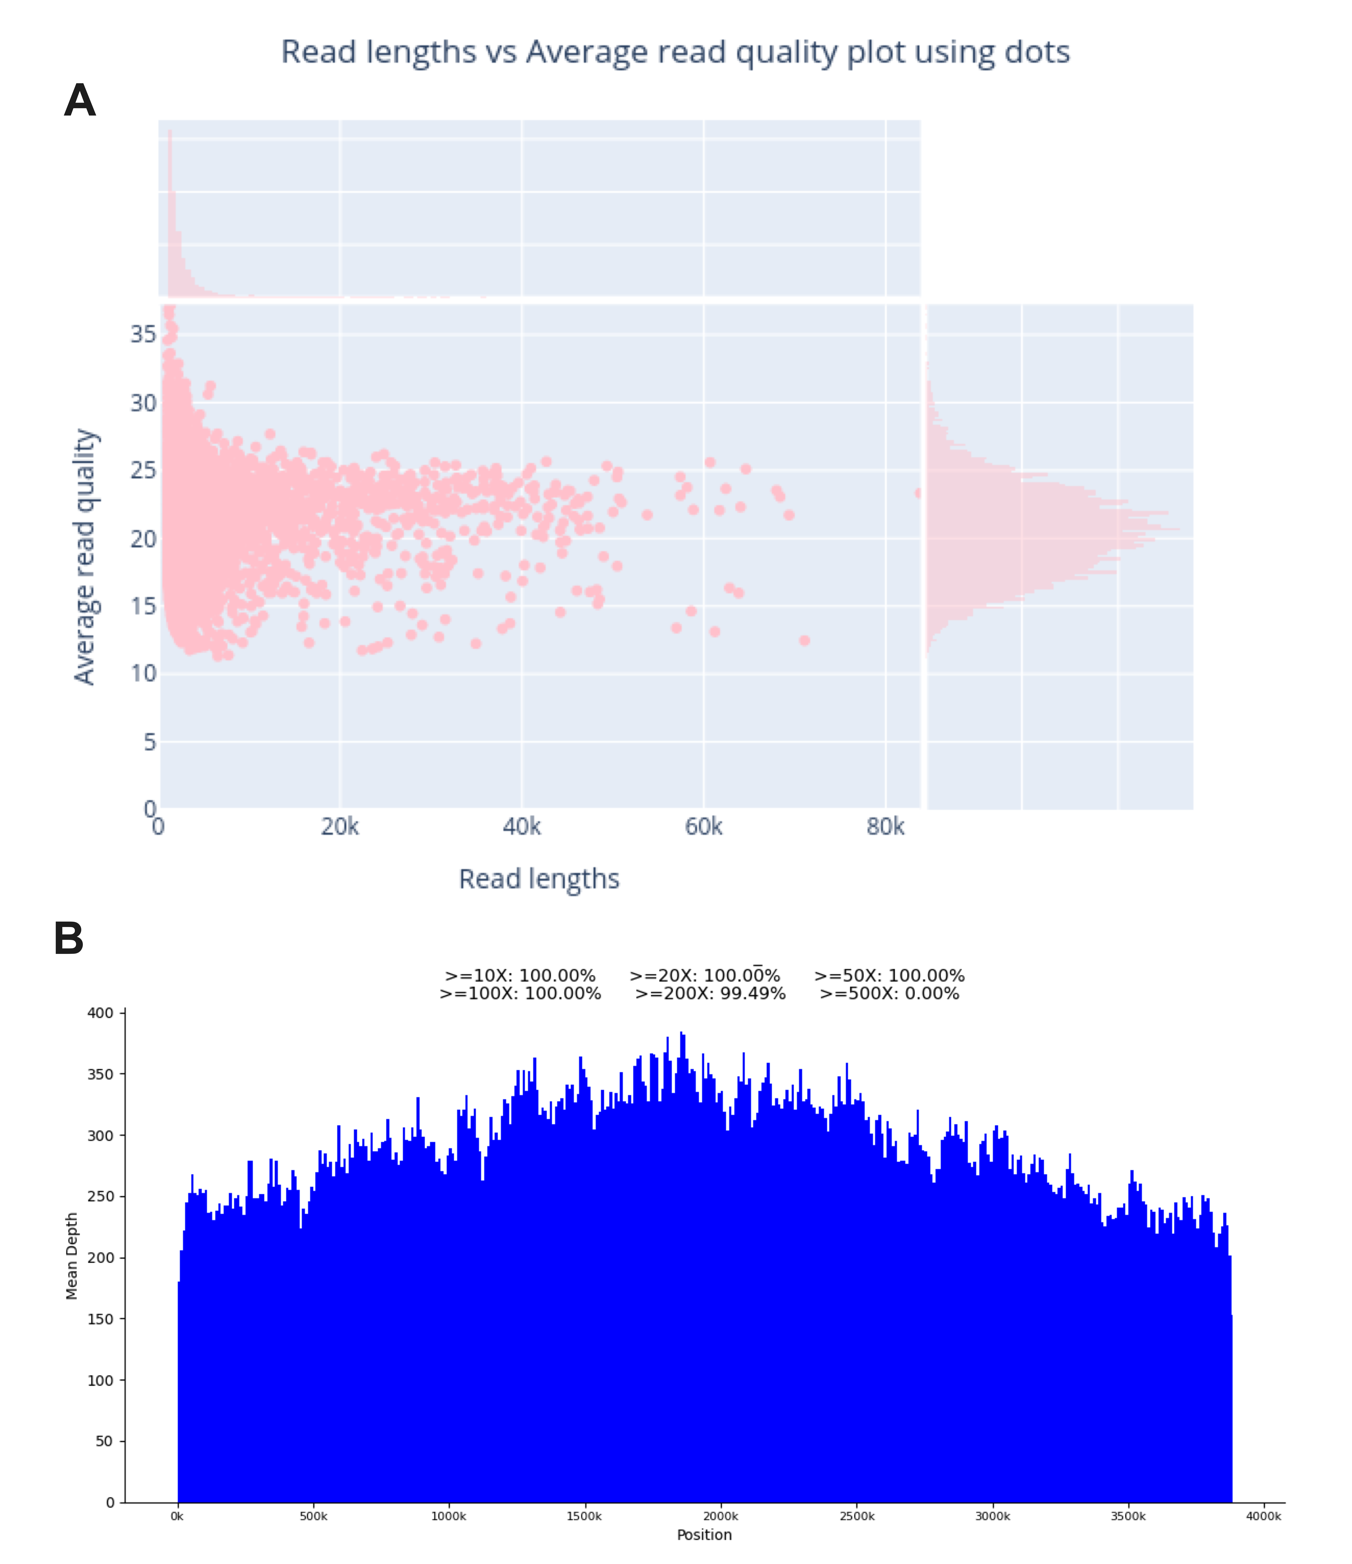


**Fig. S1** Quality overview of ONT reads and assembled genome of *Arthrobacter sp.* FMD, (a) ONT read length distribution plot; (b) genome assembly assessment.

**Table S1** General properties and statistics of *Arthrobacter sp.* FMD genome.

| **Features** | **Description** |
| --- | --- |
| Length | 4050930 |
| Count | 4 |
| GC | 64.1 |
| N50 | 3882188 |
| N90 | 3882188 |
| N ratio | 0.0 |
| coding density | 88.0 |
| tRNAs | 71 |
| tmRNAs | 1 |
| rRNAs | 19 |
| ncRNAs | 2 |
| ncRNA regions | 24 |
| CRISPR arrays | 0 |
| CDSs | 3726 |
| pseudogenes | 7 |
| hypotheticals | 388 |
| sORFs | 3 |
| gaps | 0 |
| oriCs | 1 |
| oriVs | 0 |
| oriTs | 0 |

Super DNA Marker（CW2583M）

DC 150V 1h

| 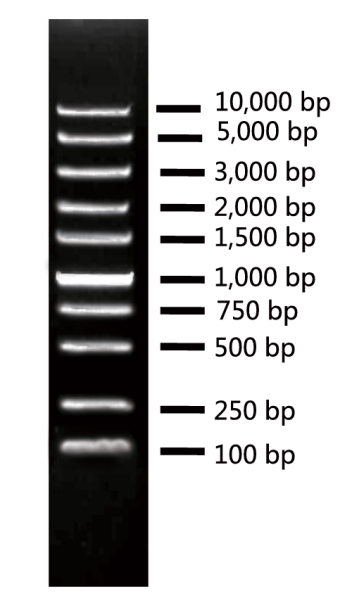 |  |
| --- | --- |


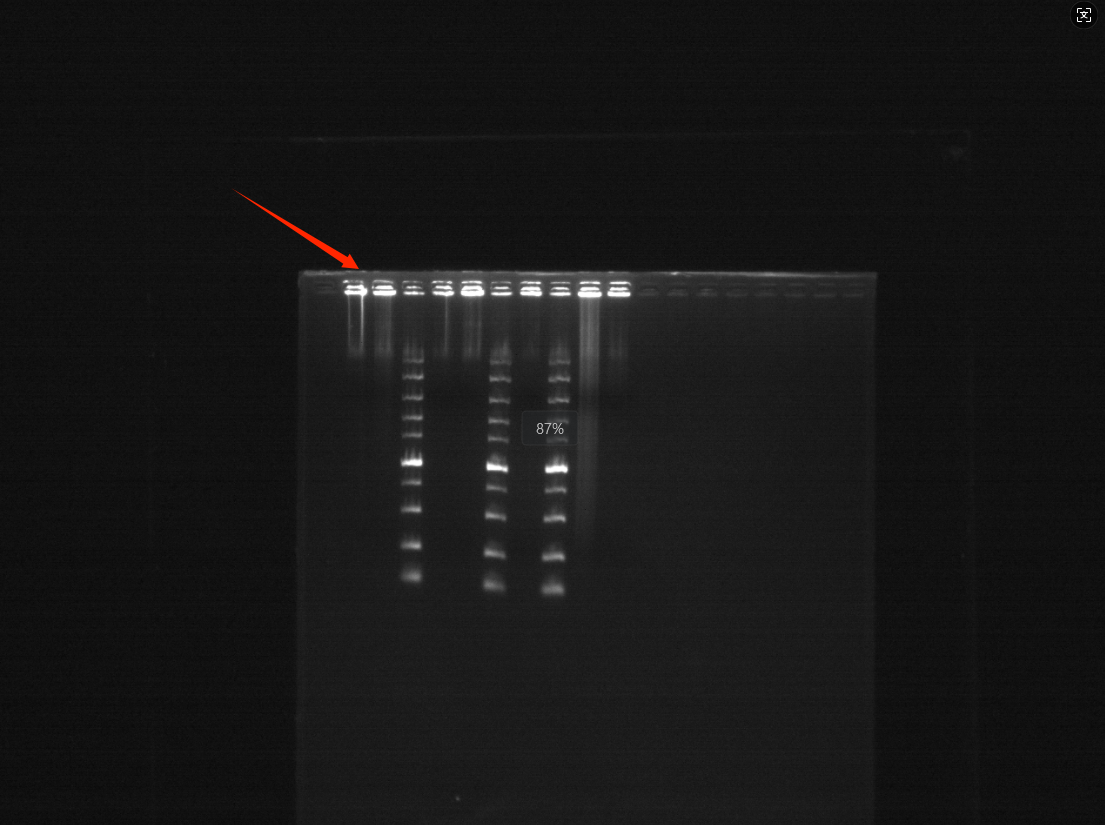


**Fig. S2 Agarose gel electrophoresis**. DNA samples were analysed by 0.7 % agarose pulsed-field gel electrophoresis (PFGE). Lane numbers are indicated above each well. M: Super DNA Marker (CW2583M). Lane 2 corresponds to the DNA sample used in this study. Each sample was loaded at 200 ng, as quantified by Qubit.
